# Supplementary material for: Prostatic Therapeutic Efficacy of LENILUTS®, a Novel Formulation with Multi-Active Principles
Source: MDPI journal article supplement (doi:10.3390/pharmaceutics14091866), 2022-09-05
Supplement: s1 [file s1]

## Supplementary Materials

**Table S1.** Composition of analyzed formulations.

| Formulation | Active Principle                                                                                        | mg/tablet    |
|-------------|---------------------------------------------------------------------------------------------------------|--------------|
| LENILUTS®   | Pine bark ( <i>Pinus ssp.</i> ) e.s.<br><i>min. titr. 70% beta-sitosterolo</i>                          | 135<br>94.50 |
|             | Curcuma ( <i>Curcuma longa</i> L., ryzom) e.s.<br><i>titr. 95% curcuminoids</i>                         | 105<br>99.75 |
|             | Pine bark ( <i>Pinus massoniana</i> Lamb.) e.s.<br><i>titr. 95% oligomeric proanthocyanidins (OPCs)</i> | 21<br>19.95  |
| CF          | Lipo-sterolic extract of <i>Serenoa repens</i>                                                          | 320 mg       |

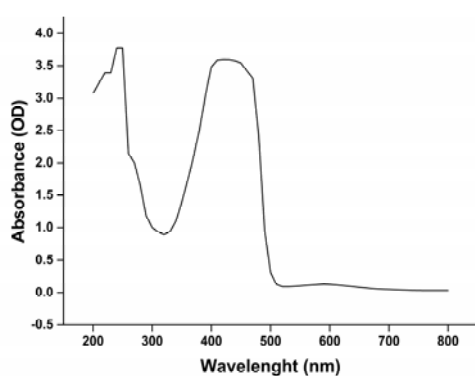

**A**

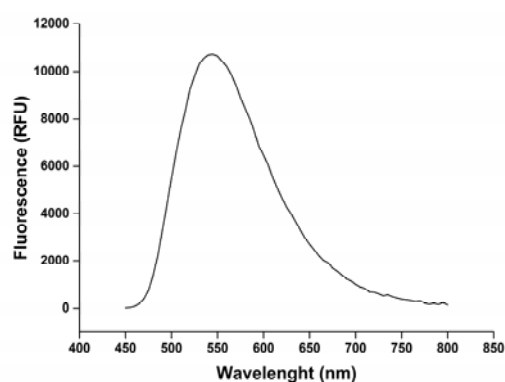

**B**

**Figure S1.** Absorption (A) spectrum (from 200 to 800 nm) and fluorescence spectrum (B) (excitation 420 nm; emission 450 to 800 nm) of DMSO-resuspended curcumin.

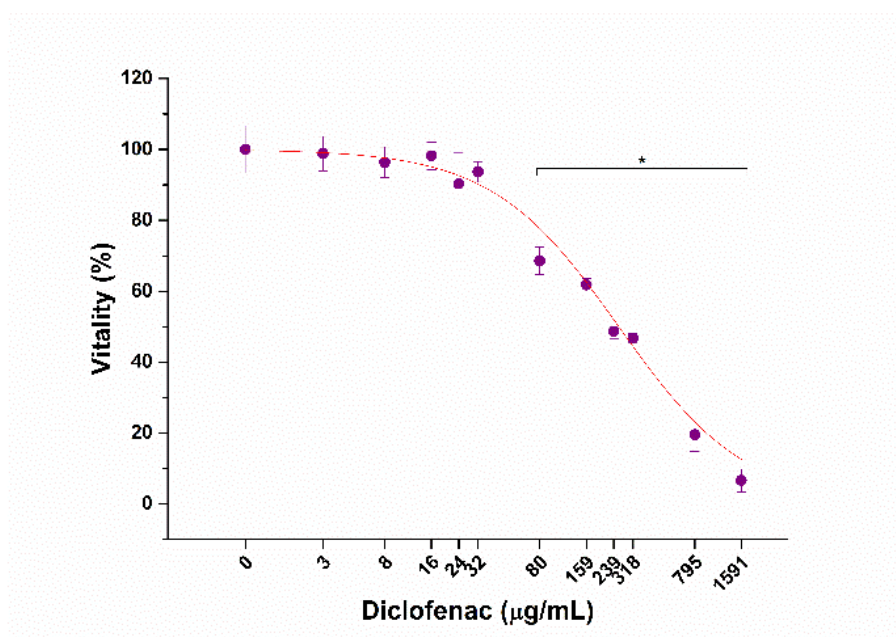

**Figure S2.** Impact of Diclofenac on in vitro prostatic model vitality, following 6 h exposure. \*  $p < 0.05$

**Table S2.** EC50 values of LENILUTS®, CF and Dutasteride at considered exposure times. Values are reported as mean  $\pm$  standard deviation.

|                    | EC50 (µg/mL) |      |
|--------------------|--------------|------|
|                    | 6 h          | 24 h |
| <b>LENILUTS®</b>   | 821          | 654  |
| <b>CF</b>          | 128          | 159  |
| <b>Dutasteride</b> | > 7.93       |      |

**Table S3.** IL-1 $\beta$  and TNF- $\alpha$  pro-inflammatory cytokines release variation in inflamed LNCaP-based in vitro prostate model following treatment with LENILUTS®, CF and Diclofenac, compared to the inflamed, non-treated model (Ctrl). LENILUTS® is endowed with a significantly higher anti-inflammatory activity compared to CF and diclofenac ( $p < 0.05$ ).

|                      | IL-1 $\beta$<br>(fold change) | TNF- $\alpha$<br>(fold change) |
|----------------------|-------------------------------|--------------------------------|
| <b>Ctrl</b>          | 11.0 $\pm$ 0.0                | 25.3 $\pm$ 4.2                 |
| <b>LENILUTS® 250</b> | 4.9 $\pm$ 0.2                 | 18.6 $\pm$ 3.0                 |
| <b>LENILUTS® 500</b> | 1.1 $\pm$ 0.1                 | 2.3 $\pm$ 2.4                  |
| <b>CF</b>            | 7.7 $\pm$ 0.1                 | 39.4 $\pm$ 5.5                 |
| <b>Diclofenac</b>    | 9.7 $\pm$ 0.0                 | 38.4 $\pm$ 5.5                 |

**Table S4.** Change in 3/7 caspases activation compared to the control in the normal and inflamed prostate cell model, following treatment with STS (positive control), LENILUTS® formula, CF and Diclofenac.

|                      | 3/7 caspases activation (change in activation) |            |
|----------------------|------------------------------------------------|------------|
|                      | Normal                                         | Inflamed   |
| <b>STS</b>           | 28.9 ± 1.5                                     | 22.8 ± 1.2 |
| <b>Control</b>       | 1.0 ± 0.0                                      | 1.0 ± 0.2  |
| <b>LENILUTS® 250</b> | 1.7 ± 0.2                                      | 1.3 ± 0.2  |
| <b>LENILUTS® 500</b> | 3.9 ± 0.0                                      | 1.6 ± 0.3  |
| <b>CF</b>            | 2.1 ± 0.4                                      | 1.6 ± 0.2  |
| <b>Diclofenac</b>    | 0.8 ± 0.1                                      | 0.9 ± 0.1  |

**Table S5.** Percentage values of DHT released from LNCaP cells stimulated with testosterone, and treated with LENILUTS®, CF and the specific 5-α reductase inhibitor Dutasteride, compared to non-stimulated cells (Ctrl). LENILUTS® 5-α reductase inhibition is significantly higher compared to CF ( $p < 0.05$ )

|                     | DHT (%)      |
|---------------------|--------------|
| <b>Ctrl</b>         | 0.0 ± 0.0    |
| <b>Testosterone</b> | 100.0 ± 10.0 |
| <b>LENILUTS®</b>    | 76.7 ± 7.7   |
| <b>CF</b>           | 75.8 ± 7.6   |

**Table S6.** Percentage values of PSA release from DHT-stimulated LNCaP cells following treatment with LENILUTS®, CF and Dutasteride, compared to control (Ctrl; unstimulated cells). LENILUTS® is more effective in reducing PSA production by DHT-stimulated LNCaP cell compared to CF ( $p < 0.05$ ).

|                           | PSA (%)      |
|---------------------------|--------------|
| <b>Ctrl</b>               | 100.0 ± 1.6  |
| <b>Ctrl + DHT</b>         | 465.4 ± 31.8 |
| <b>LENILUTS® 100+ DHT</b> | 427.8 ± 29.3 |
| <b>LENILUTS® 250+ DHT</b> | 145.7 ± 12.5 |
| <b>CF + DHT</b>           | 428.1 ± 22.0 |
| <b>Dutasteride® + DHT</b> | 189.3 ± 19.7 |

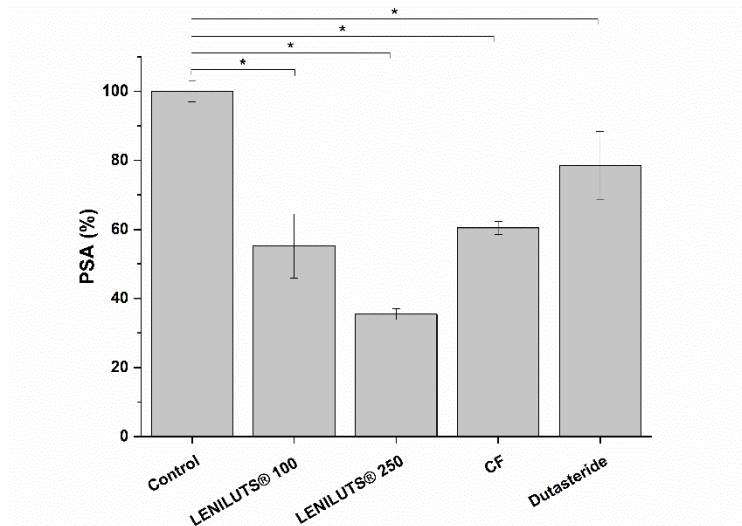

**Figure S3.** Prostate specific antigen (PSA) release in LNCaP prostatic cells treated with LENILUTS®, CF and Dutasteride. LENILUTS® is more effective in reducing PSA production by LNCaP cell compared to CF and Dutasteride. \*  $p < 0.05$ .

**Table S7.** LNCaP-released PSA percentage values following treatment with LENILUTS®, CF and Dutasteride, compare to untreated control (Ctrl). LENILUTS® is more effective in reducing PSA production by LNCaP cell compared to CF and Dutasteride ( $p < 0.05$ ).

|               | PSA (%)     |
|---------------|-------------|
| Ctrl          | 100.0 ± 3.1 |
| LENILUTS® 100 | 55.2 ± 9.3  |
| LENILUTS® 250 | 35.4 ± 1.5  |
| CF            | 60.4 ± 1.9  |
| Dutasteride   | 78.5 ± 9.8  |
